# Supplementary material
Source: Springer Nature journal article supplement (https://www.springermedizin.de/resource/supplementary/12985_2013_2331_MOESM3_ESM.pdf/9606504)

**A**

300 bp

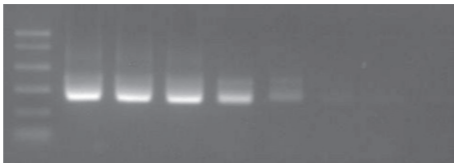

IAP

M 100pg 10pg 1pg 0,1pg 10fg 5fg 1fg 0fg

**B**

750bp

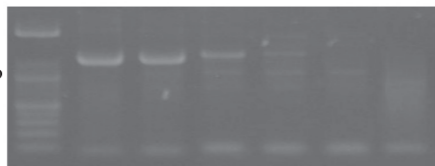*env*

M 1000 500 100 10 1 0

**C**

750bp

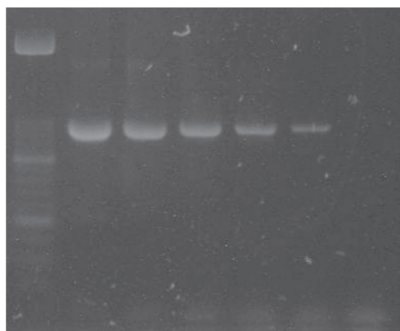*gag*

M 1000 500 100 10 1 0

Supplement: MOESM3 [file 9606504]
